# Supplementary material
Source: Springer Nature journal article supplement (https://www.springermedizin.de/resource/supplementary/13098_2013_229_MOESM1_ESM.pdf/9670786)
Supplement: MOESM1 [file 9670786]

MEDLINE, SCOPUS, CINAHL, Web of  
Science and The Cochrane Library,  
Historical search

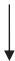

Total of 436 clinical trials screened

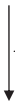

396 trials excluded: Not  
randomized controlled trials

40 RCTs retrieved

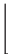

10 randomized trials

(14,15,23-30)

Excluded (n=30): Pregnancy, Mixed age  
group, Mixed population (T1DM and T2DM)  
GlucoWatch biographer used
